# Supplementary material for: Construction of cost-effective bimetallic nanoparticles on titanium carbides as a superb catalyst for promoting hydrolysis of ammonia borane
Source: Royal Society of Chemistry journal article supplement (doi:10.1039/c7ra10568a), 2018-01-01
Supplement: c7ra10568a1.pdf [file c7ra10568a1.pdf]

## Supplementary Information

# Construction of cost-effective bimetallic nanoparticles on titanium carbides as a superb catalyst for promoting hydrolysis of ammonia borane

Zhangwei Guo,<sup>‡a</sup> Tong Liu,<sup>‡\*b</sup> Qingtao Wang<sup>b</sup> and Guanhui Gao<sup>\*c</sup>

<sup>a</sup> College of Ocean Science and Engineering, Shanghai Maritime University, Haigang Ave 1550, 201306 Shanghai, China.

<sup>b</sup> College of Materials Science and Engineering, Qingdao University of Science and Technology, Zhengzhou Rd 53, 266000 Qingdao, China.

<sup>c</sup> Paul-Drude-Institut für Festkörperelektronik, Hausvogteiplatz 5–7, 10117 Berlin, Germany.

## 1. Materials

Ammonia borane ( $\text{NH}_3 \cdot \text{BH}_3$ , Aladdin reagent Co., Ltd, >97%), nickel(II) chloride hexahydrate ( $\text{NiCl}_2 \cdot 6\text{H}_2\text{O}$ , Sinopharm Chemical Reagent Co., Ltd, >98%), cobalt(II) chloride hexahydrate ( $\text{CoCl}_2 \cdot 6\text{H}_2\text{O}$ , Sinopharm Chemical Reagent Co., Ltd, 99%), sodium borohydride ( $\text{NaBH}_4$ , Sinopharm Chemical Reagent Co., Ltd, >96%), vulcanxc-72 carbon (Cabot corporation,  $\geq 97\%$ ),  $\text{Al}_2\text{O}_3$  (Sigma-Aldrich Co., Ltd, 99%), were used without further purification. De-ionized water with the specific resistance of 18.2  $\text{M}\Omega \cdot \text{cm}$  was obtained by reversed osmosis followed by ion-exchange and filtration.

## 2. Synthesis of Mxene:

The support MXene was initially prepared at room temperature using  $\text{Ti}_3\text{AlC}_2$  as raw material and concentrated hydrofluoric acid as the etching agent. Specifically, concentrated hydrofluoric acid (40%, 100 mL) was slowly added to a beaker containing  $\text{Ti}_3\text{AlC}_2$  (5 g). The solution was stirred for 24 h to remove the Al layer in  $\text{Ti}_3\text{AlC}_2$ . The black precipitate was then separated from the as-prepared suspension by centrifugation and washed several times with distilled water and absolute ethanol. Finally, the product was dried under vacuum at 60 C for 12 h.

## 3. Durability testing of the catalysts:

For testing the durability of CoNi/MXene catalysts, 1 mmol AB was subsequently added into the reaction flask after the completion of the first-run decomposition of AB.

Such test cycles of the catalyst for the decomposition of AB were carried out for 5 runs at 50 °C by adding AB.

#### **4. Calculation of turnover frequency (TOF)**

The TOF reported here is an apparent TOF value based on the number of Ni and Co atoms in catalyst, which is calculated from the equation as follow:

$$\text{TOF} = P_0 V / (RTn_{\text{NiCo}}t)$$

Where  $P_0$  is the atmospheric pressure (101325 Pa),  $V$  is the final generated volume of  $\text{H}_2$  gas,  $R$  is the universal gas constant ( $8.3145 \text{ m}^3 \text{ Pa mol}^{-1} \text{ K}^{-1}$ ),  $T$  is the room temperature (298 K),  $n_{\text{NiCo}}$  is the total mole number of Ni and Co atoms in catalyst and  $t$  is the completion time of the reaction in minute.

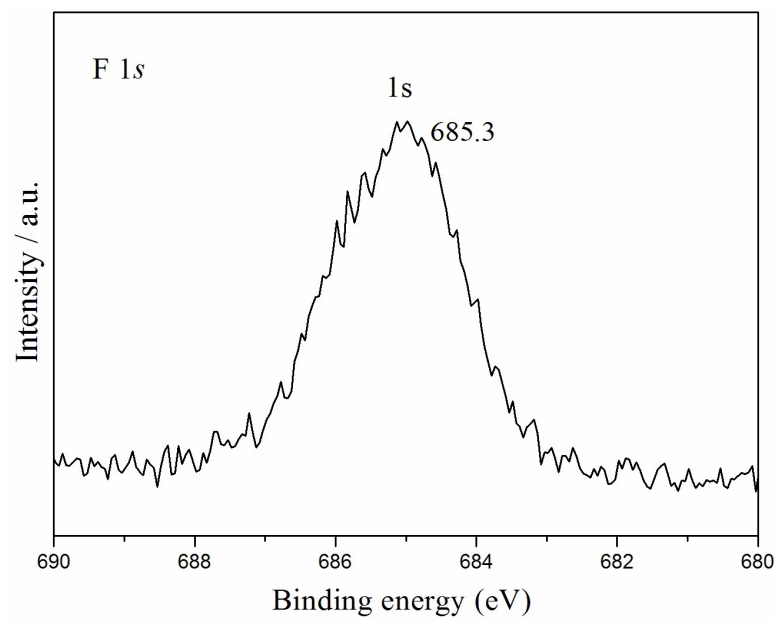

**Fig. S1.** XPS spectrum of F 1s for CoNi/MXene.

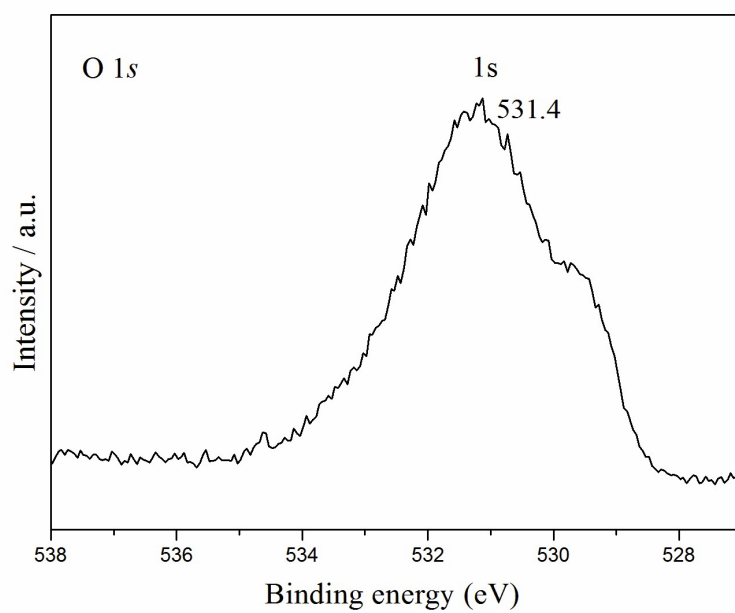

**Fig. S2.** XPS spectrum of O 1s for CoNi/MXene.

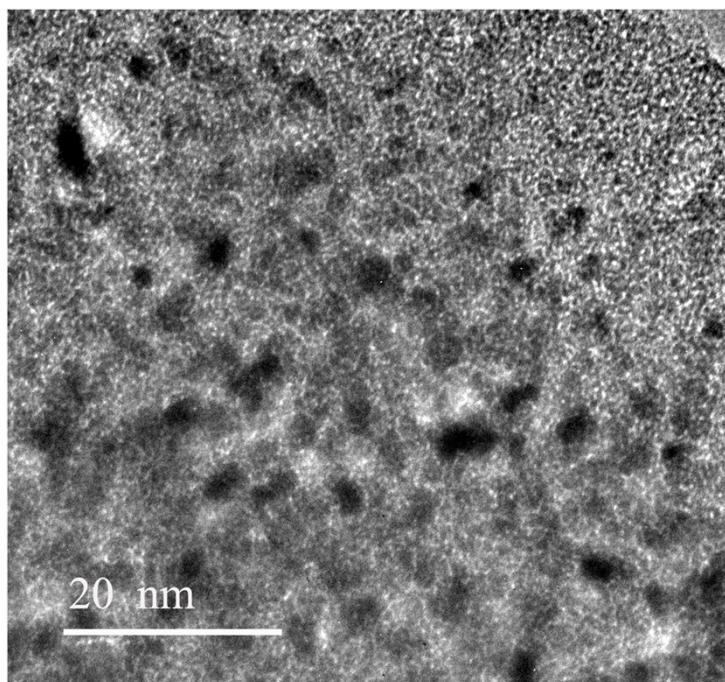

**Fig. S3.** TEM images of the Co<sub>0.7</sub>Ni<sub>0.3</sub>/MXene.

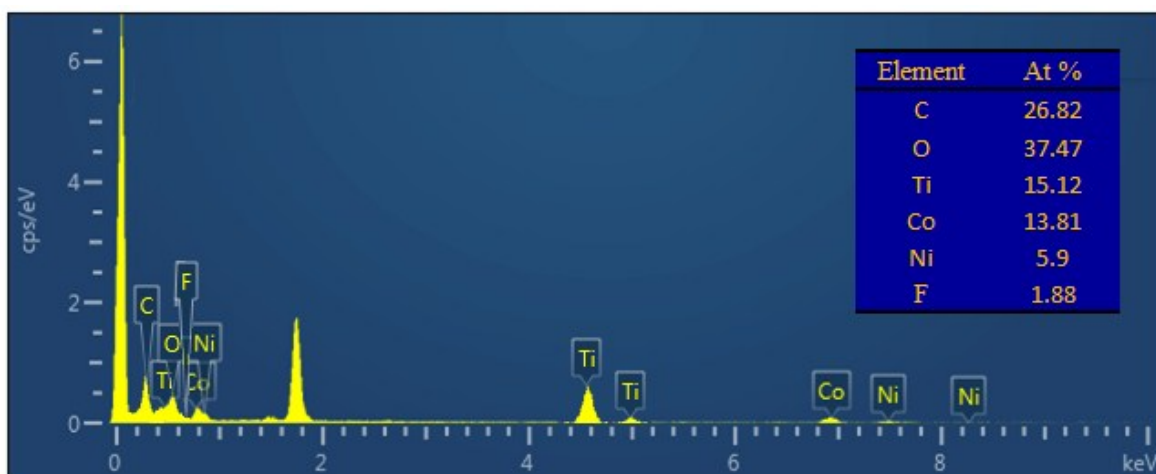

**Fig. S4.** EDX spectra for the prepared CoNi/MXene catalyst.

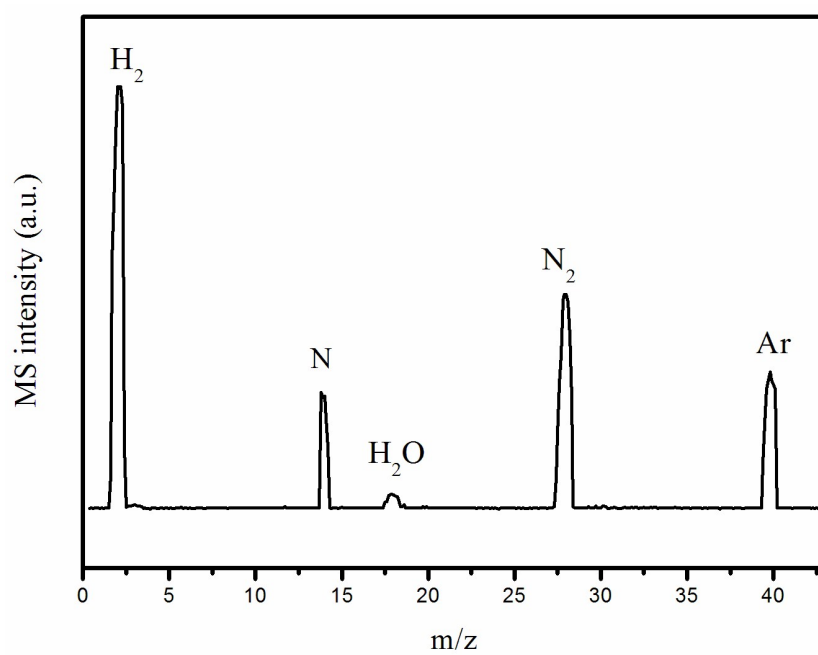

**Fig. S5.** Mass spectrometry profile for the gases released from the decomposition reaction of AB catalyzed by Co<sub>0.7</sub>Ni<sub>0.3</sub>/MXene at 50 °C.



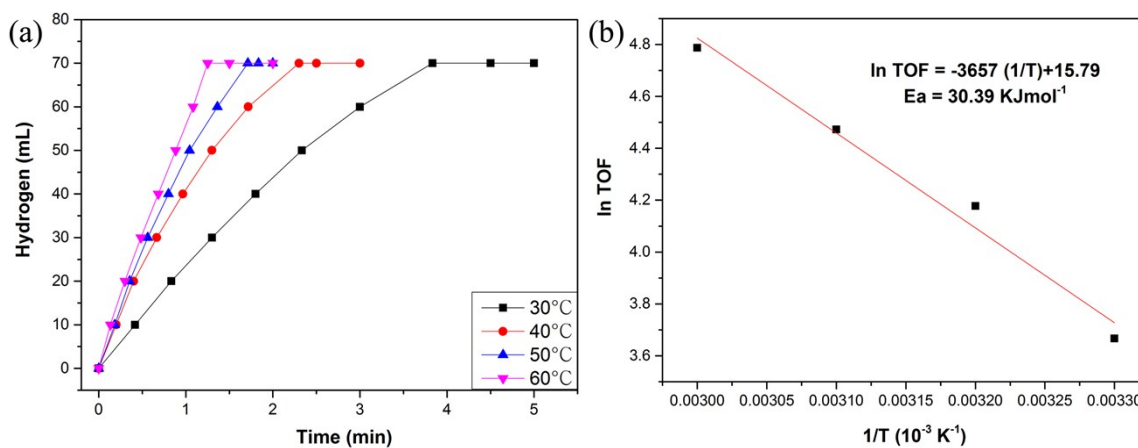

**Fig. S6.** Time course plots for H<sub>2</sub> generation from AB decomposition catalyzed by Co<sub>0.7</sub>Ni<sub>0.3</sub>/MXene at different temperatures (a); arrhenius plot (ln(TOF) vs. 1/T (b). The molar ratio of metal/AB = 0.02.

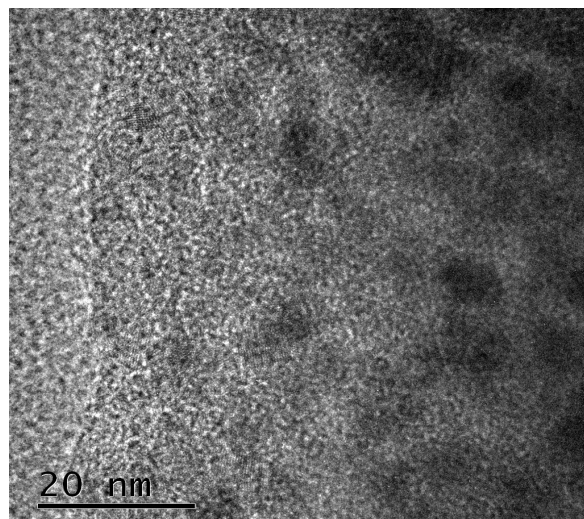

**Fig. S7.** TEM image of the  $\text{Co}_{0.7}\text{Ni}_{0.3}/\text{MXene}$  NPs after the sixth cycle.

Table S1 ICP-AES results of different catalysts

| Catalyst                                   | Co Ni final molar ratio |
|--------------------------------------------|-------------------------|
| Co/MXene                                   | 100:0                   |
| Co <sub>0.9</sub> Ni <sub>0.1</sub> /MXene | 88:12                   |
| Co <sub>0.7</sub> Ni <sub>0.3</sub> /MXene | 72:28                   |
| Co <sub>0.5</sub> Ni <sub>0.5</sub> /MXene | 53:47                   |
| Co <sub>0.3</sub> Ni <sub>0.7</sub> /MXene | 31:69                   |
| Ni/MXene                                   | 0:100                   |
